# Supplementary material
Source: Springer Nature journal article supplement (https://www.springermedizin.de/resource/supplementary/13075_2010_2902_MOESM11_ESM.pdf/9693146)

Figure 6

(C)

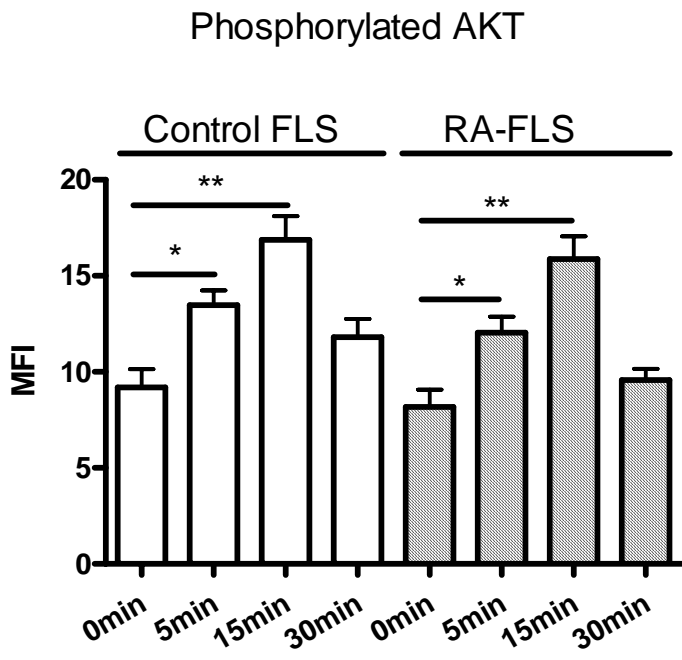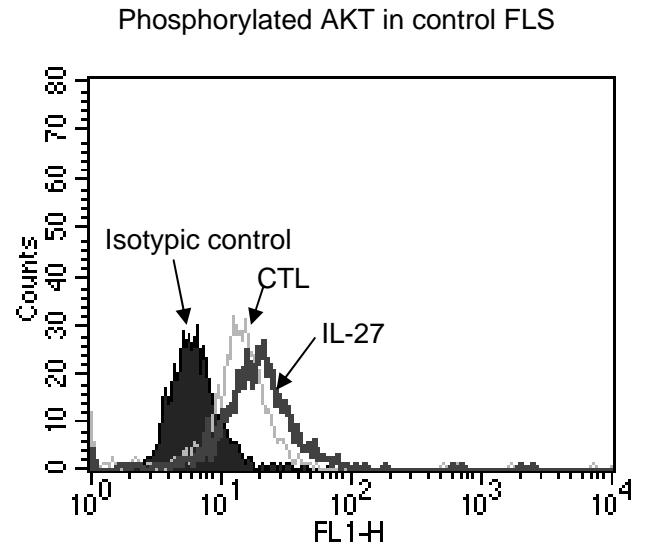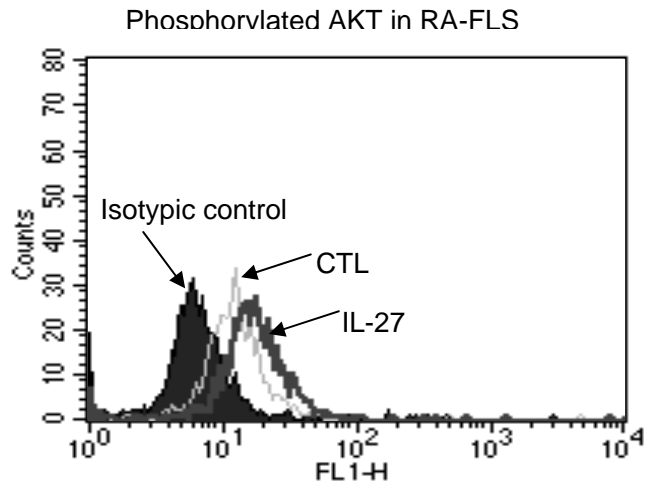

(D)

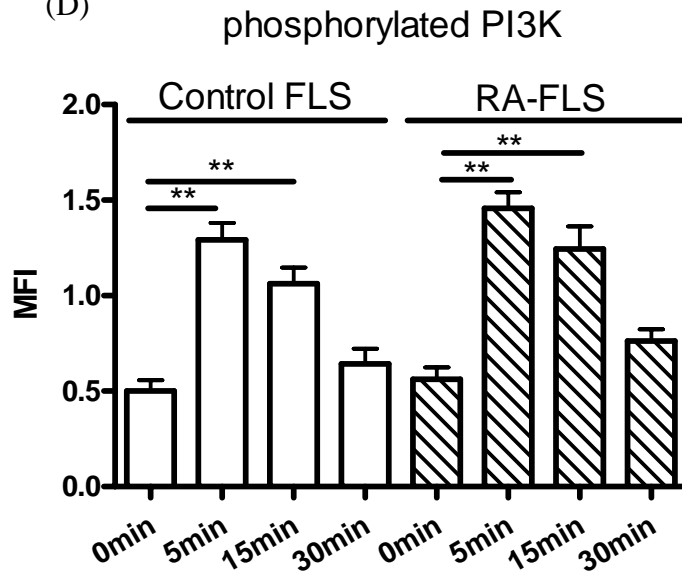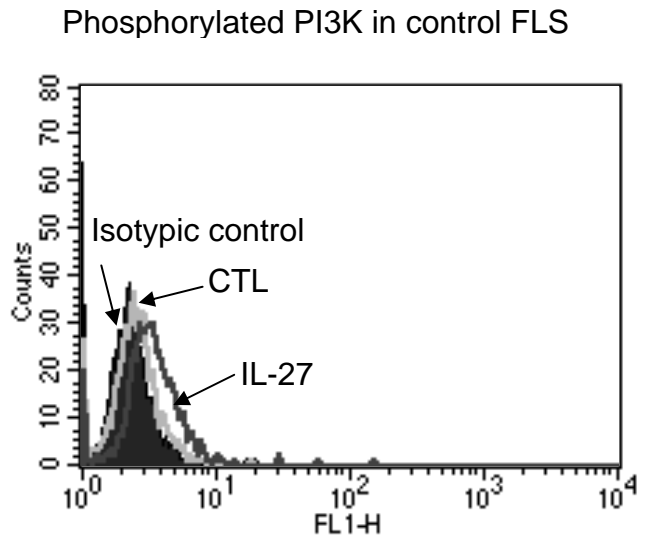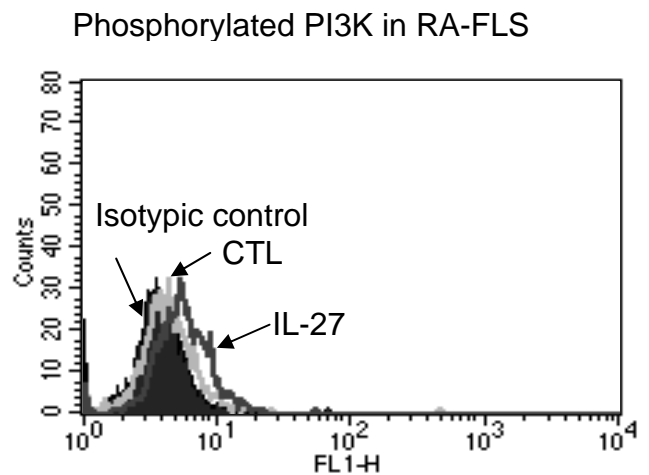

Supplement: MOESM11 [file 9693146]
